# Supplementary material for: Isotopic labelling reveals the efficient adaptation of wheat root TCA cycle flux modes to match carbon demand under ammonium nutrition
Source: PubMed Central journal article supplement (PMC6586781; doi:10.1038/s41598-019-45393-8), 2019-06-20
Supplement: 41598_2019_45393_MOESM1_ESM.pdf [file 41598_2019_45393_MOESM1_ESM.pdf]

## **Isotopic labelling reveals the efficient adaptation of wheat root TCA cycle flux modes to match carbon demand under ammonium nutrition**

Izargi Vega-Mas, Caroline Cukier, Inmaculada Coletto, Carmen González-Murua, Anis M. Limami, M<sup>a</sup>. Begoña González-Moro, and Daniel Marino

### **SUPPLEMENTARY DATA**

**Supplementary Table S1** <sup>15</sup>N enrichment of amino acids after <sup>15</sup>NH<sub>4</sub><sup>+</sup>-incubation

**Supplementary Table S2** <sup>15</sup>N enrichment of amino acids after <sup>15</sup>NO<sub>3</sub><sup>-</sup>-incubation

**Supplementary Table S3** <sup>13</sup>C enrichment of organic acids and amino acids after [<sup>13</sup>C]Pyr – incubation

**Supplementary Table S4** <sup>13</sup>C enrichment of organic acids and amino acids after [<sup>13</sup>C]Pyr-incubation

**Supplementary Figure S1** Picture of wheat plants grown under nitrate or ammonium nutrition

**Supplementary Figure S2** Total amino acids and organic acids

**Supplementary Figure S3** Label distribution of amides after <sup>15</sup>NH<sub>4</sub>-incubation

**Supplementary Figure S4** Label distribution of amides after <sup>15</sup>NO<sub>3</sub>-incubation

**Supplementary Figure S5** Minor [<sup>15</sup>N]amino acid contents after <sup>15</sup>NH<sub>4</sub><sup>+</sup>-incubation

**Supplementary Figure S6** Minor [<sup>15</sup>N]amino acid contents after <sup>15</sup>NO<sub>3</sub><sup>-</sup>-incubation

**Supplementary Figure S7** Other [<sup>15</sup>N]amino acids in presence of inhibitors MSX and AZA

**Supplementary Figure S8** Minor [<sup>15</sup>N]amino acid and [<sup>13</sup>C]organic acid contents after [<sup>13</sup>C]Pyr - incubation

**Supplementary Table S1.**  $^{15}\text{N}$  enrichment of amino acids after  $^{15}\text{NH}_4^+$ -incubation of roots of wheat plants grown under nitrate ( $\text{RN-}^{15}\text{NH}_4^+$ ) or ammonium ( $\text{RA-}^{15}\text{NH}_4^+$ ) nutrition for 0.5, 2, and 6 h.

|      | $[^{15}\text{N}]$ amino acid enrichment (%) |              |              |                                |              |              |
|------|---------------------------------------------|--------------|--------------|--------------------------------|--------------|--------------|
|      | $\text{RN-}^{15}\text{NH}_4^+$              |              |              | $\text{RA-}^{15}\text{NH}_4^+$ |              |              |
|      | 30 min                                      | 2 h          | 6 h          | 30 min                         | 2 h          | 6 h          |
| Ala  | 9.93 ± 0.63                                 | 29.79 ± 2.21 | 36.57 ± 1.65 | 5.76 ± 0.17                    | 17.94 ± 0.39 | 26.54 ± 2.09 |
| Asn  | 5.47 ± 0.57                                 | 9.31 ± 0.79  | 34.47 ± 5.75 | 3.58 ± 0.63                    | 6.96 ± 0.67  | 8.13 ± 0.97  |
| Asp  | 12.51 ± 0.47                                | 35.15 ± 0.61 | 37.89 ± 1.32 | 7.11 ± 0.57                    | 15.85 ± 0.85 | 18.85 ± 1.71 |
| Gln  | 73.62 ± 0.93                                | 84.56 ± 0.28 | 77.27 ± 4.81 | 23.86 ± 0.67                   | 38.19 ± 4.06 | 32.62 ± 7.37 |
| Glu  | 10.43 ± 0.53                                | 36.06 ± 0.54 | 40.57 ± 1.28 | 8.41 ± 0.10                    | 23.03 ± 0.50 | 25.84 ± 1.84 |
| Gly  | 6.43 ± 0.54                                 | 12.39 ± 1.58 | 13.61 ± 2.28 | 2.67 ± 0.47                    | 4.79 ± 0.20  | 5.94 ± 0.33  |
| Ile  | 3.86 ± 0.38                                 | 12.04 ± 0.68 | 12.50 ± 0.17 | 2.64 ± 0.84                    | 6.34 ± 0.49  | 8.83 ± 0.61  |
| Leu  | 4.15 ± 0.35                                 | 13.68 ± 0.45 | 11.18 ± 0.14 | 1.85 ± 0.03                    | 6.75 ± 0.25  | 7.58 ± 0.33  |
| Met  | 2.15 ± 0.16                                 | 6.62 ± 0.19  | 8.64 ± 0.25  | 1.53 ± 0.54                    | 2.67 ± 0.70  | 3.12 ± 0.52  |
| Phe  | 7.52 ± 0.87                                 | 15.00 ± 0.80 | 9.34 ± 0.73  | 5.61 ± 0.92                    | 9.92 ± 0.00  | 8.48 ± 0.00  |
| Pro  | 7.39 ± 0.26                                 | 11.68 ± 0.98 | 9.04 ± 0.47  | 5.53 ± 0.00                    | 0.00 ± 0.00  | 6.07 ± 1.11  |
| Ser  | 2.12 ± 0.19                                 | 5.25 ± 0.11  | 8.39 ± 0.76  | 1.38 ± 0.11                    | 3.65 ± 0.13  | 7.22 ± 0.54  |
| Thr  | 2.35 ± 0.14                                 | 3.56 ± 0.28  | 2.88 ± 0.18  | 1.90 ± 0.28                    | 3.28 ± 0.36  | 2.85 ± 0.03  |
| Tyr  | 4.62 ± 0.58                                 | 10.28 ± 0.89 | 7.71 ± 0.41  | 2.76 ± 0.19                    | 6.72 ± 0.24  | 8.28 ± 0.72  |
| Val  | 1.48 ± 0.17                                 | 4.35 ± 0.12  | 5.74 ± 0.41  | 0.68 ± 0.23                    | 2.16 ± 0.41  | 3.52 ± 0.52  |
| GABA | 1.62 ± 0.18                                 | 8.27 ± 0.73  | 31.58 ± 1.13 | 1.73 ± 0.15                    | 9.14 ± 1.17  | 19.15 ± 1.45 |

Values represent mean ± SE (n = 3).

**Supplementary Table S2.**  $^{15}\text{N}$  enrichment of amino acids in wheat roots grown under nitrate ( $\text{RN-}^{15}\text{NO}_3^-$ ) or ammonium ( $\text{RA-}^{15}\text{NO}_3^-$ ) nutrition incubated with 10 mM  $^{15}\text{NO}_3^-$  for 0.5, 2, and 6 h.

|      | $^{15}\text{N}$ amino acid enrichment (%) |             |             |                                |             |             |
|------|-------------------------------------------|-------------|-------------|--------------------------------|-------------|-------------|
|      | $\text{RN-}^{15}\text{NO}_3^-$            |             |             | $\text{RA-}^{15}\text{NO}_3^-$ |             |             |
|      | 30 min                                    | 2 h         | 6 h         | 30 min                         | 2 h         | 6 h         |
| Ala  | 0.30 ± 0.07                               | 1.16 ± 0.25 | 1.16 ± 0.31 | 0.65 ± 0.27                    | 0.12 ± 0.00 | 0.90 ± 0.26 |
| Asn  | 4.08 ± 0.15                               | 4.60 ± 0.40 | 4.13 ± 0.47 | 2.38 ± 0.39                    | 2.87 ± 0.00 | 2.79 ± 0.24 |
| Asp  | 1.49 ± 0.29                               | 1.31 ± 0.03 | 1.46 ± 0.13 | 2.15 ± 0.46                    | 2.19 ± 0.00 | 1.61 ± 0.43 |
| Gln  | 4.94 ± 0.25                               | 6.67 ± 0.78 | 6.62 ± 0.35 | 3.64 ± 0.02                    | 3.98 ± 0.00 | 3.47 ± 0.66 |
| Glu  | 0.69 ± 0.09                               | 1.52 ± 0.05 | 1.78 ± 0.16 | 1.61 ± 0.29                    | 2.07 ± 0.00 | 1.59 ± 0.46 |
| Gly  | 1.88 ± 0.21                               | 2.07 ± 0.03 | 1.74 ± 0.05 | 2.48 ± 0.00                    | 2.67 ± 0.13 | 2.69 ± 0.38 |
| Ile  | 0.84 ± 0.12                               | 0.80 ± 0.11 | 0.23 ± 0.02 | 2.60 ± 0.90                    | 0.84 ± 0.00 | 1.18 ± 0.45 |
| Leu  | 0.97 ± 0.29                               | 1.18 ± 0.08 | 0.88 ± 0.06 | 0.63 ± 0.06                    | 1.19 ± 0.00 | 1.29 ± 0.33 |
| Met  | 1.23 ± 0.19                               | 1.56 ± 0.18 | 1.47 ± 0.06 | 1.30 ± 0.16                    | 1.36 ± 0.00 | 1.26 ± 0.10 |
| Phe  | 2.98 ± 0.00                               | 4.74 ± 0.90 | 0.89 ± 0.12 | 0.00 ± 0.00                    | 0.84 ± 0.18 | 5.46 ± 0.00 |
| Pro  | 6.41 ± 0.08                               | 8.67 ± 1.06 | 5.02 ± 0.55 | 3.76 ± 0.00                    | 0.00 ± 0.00 | 0.00 ± 0.00 |
| Ser  | 0.38 ± 0.07                               | 0.62 ± 0.05 | 0.82 ± 0.15 | 0.83 ± 0.05                    | 0.59 ± 0.00 | 0.47 ± 0.11 |
| Thr  | 2.00 ± 0.10                               | 2.17 ± 0.08 | 1.97 ± 0.24 | 2.84 ± 0.22                    | 2.03 ± 0.00 | 2.44 ± 0.24 |
| Tyr  | 3.01 ± 0.09                               | 1.77 ± 0.15 | 2.03 ± 0.19 | 0.00 ± 0.00                    | 1.66 ± 0.01 | 1.94 ± 0.35 |
| Val  | 0.72 ± 0.11                               | 0.81 ± 0.29 | 0.53 ± 0.09 | 0.09 ± 0.04                    | 0.16 ± 0.00 | 1.01 ± 0.00 |
| GABA | 1.14 ± 0.22                               | 2.27 ± 0.30 | 3.23 ± 0.39 | 1.47 ± 0.12                    | 1.30 ± 0.00 | 1.65 ± 0.07 |

Values represent mean ± SE (n = 3).

**Supplementary Table S3.**  $^{13}\text{C}$  enrichment of organic acids and amino acids in wheat roots grown under nitrate (RN- $^{13}\text{C}$ Pyr) or ammonium (RA- $^{13}\text{C}$ Pyr) nutrition incubated with 10 mM  $^{13}\text{C}$ Pyr for 0.5, 2 and 6 h.

|            | $^{13}\text{C}$ organic acid and $^{13}\text{C}$ amino acid enrichment (%) |              |              |                          |              |              |
|------------|----------------------------------------------------------------------------|--------------|--------------|--------------------------|--------------|--------------|
|            | RN- $^{13}\text{C}$ -Pyr                                                   |              |              | RA- $^{13}\text{C}$ -Pyr |              |              |
|            | 30 min                                                                     | 2 h          | 6 h          | 30 min                   | 2 h          | 6 h          |
| Pyr        | 81.22 ± 5.10                                                               | 89.23 ± 1.29 | 80.92 ± 5.21 | 78.59 ± 5.29             | 75.15 ± 3.30 | 76.42 ± 1.95 |
| Citrate    | 3.22 ± 1.22                                                                | 10.87 ± 1.38 | 26.92 ± 1.32 | 11.61 ± 1.65             | 22.88 ± 0.52 | 47.22 ± 0.48 |
| Isocitrate | 2.08 ± 0.71                                                                | 9.48 ± 0.00  | 11.59 ± 1.34 | 10.26 ± 0.56             | 17.90 ± 1.13 | 44.80 ± 0.48 |
| 2-OG       | 3.47 ± 0.04                                                                | 16.28 ± 0.74 | 28.34 ± 1.42 | 8.59 ± 0.53              | 20.42 ± 0.30 | 32.27 ± 0.57 |
| Succinate  | 0.38 ± 0.06                                                                | 1.61 ± 0.21  | 3.82 ± 0.27  | 1.62 ± 0.15              | 2.99 ± 0.11  | 8.46 ± 0.40  |
| Fumarate   | 1.61 ± 0.22                                                                | 12.23 ± 0.72 | 24.72 ± 1.46 | 4.63 ± 0.44              | 13.26 ± 0.41 | 23.93 ± 0.42 |
| Malate     | 0.47 ± 0.27                                                                | 3.79 ± 0.42  | 12.86 ± 1.60 | 2.88 ± 0.52              | 11.25 ± 1.21 | 22.26 ± 0.56 |
| Ala        | 10.72 ± 2.33                                                               | 26.17 ± 1.10 | 27.21 ± 1.74 | 7.19 ± 0.80              | 8.33 ± 0.37  | 12.03 ± 0.27 |
| Asn        | 0.38 ± 0.25                                                                | 1.04 ± 0.26  | 5.45 ± 1.78  | 0.17 ± 0.00              | 1.28 ± 0.03  | 1.43 ± 0.22  |
| Asp        | 1.98 ± 0.06                                                                | 11.21 ± 1.01 | 21.60 ± 1.76 | 4.18 ± 0.68              | 7.99 ± 0.46  | 20.36 ± 0.22 |
| Cys        | 0.04 ± 0.00                                                                | 0.35 ± 0.00  | 0.12 ± 0.01  | 0.14 ± 0.09              | 0.44 ± 0.21  | 0.19 ± 0.11  |
| Gln        | 0.67 ± 0.25                                                                | 13.54 ± 0.77 | 21.70 ± 2.56 | 1.69 ± 0.52              | 8.03 ± 0.94  | 10.90 ± 2.19 |
| Glu        | 3.52 ± 0.52                                                                | 19.22 ± 0.83 | 30.69 ± 2.28 | 7.54 ± 0.50              | 19.60 ± 0.32 | 35.10 ± 0.27 |
| Gly        | 0.00 ± 0.00                                                                | 1.01 ± 0.00  | 0.44 ± 0.22  | 1.00 ± 0.00              | 1.77 ± 0.25  | 2.32 ± 0.33  |
| His        | 0.00 ± 0.00                                                                | 0.00 ± 0.00  | 0.00 ± 0.00  | 4.66 ± 1.59              | 2.58 ± 0.89  | 2.39 ± 0.93  |
| Ile        | 0.33 ± 0.18                                                                | 0.57 ± 0.26  | 0.19 ± 0.06  | 0.21 ± 0.11              | 0.22 ± 0.03  | 0.65 ± 0.10  |
| Leu        | 1.44 ± 0.93                                                                | 0.29 ± 0.00  | 0.18 ± 0.10  | 0.34 ± 0.07              | 0.18 ± 0.05  | 1.00 ± 0.20  |
| Lys        | 12.95 ± 6.70                                                               | 0.00 ± 0.00  | 0.00 ± 0.00  | 4.35 ± 0.00              | 0.00 ± 0.00  | 3.16 ± 1.47  |
| Met        | 0.00 ± 0.00                                                                | 0.00 ± 0.00  | 0.00 ± 0.00  | 1.07 ± 0.00              | 0.82 ± 0.47  | 1.08 ± 0.16  |
| Phe        | 2.59 ± 0.00                                                                | 2.21 ± 0.93  | 7.64 ± 0.13  | 3.00 ± 0.72              | 4.61 ± 0.93  | 5.58 ± 0.27  |
| Ser        | 0.17 ± 0.00                                                                | 0.99 ± 0.28  | 2.77 ± 0.16  | 0.61 ± 0.48              | 0.35 ± 0.07  | 4.33 ± 0.07  |
| Tyr        | 0.00 ± 0.00                                                                | 0.00 ± 0.00  | 3.36 ± 1.49  | 3.41 ± 2.53              | 2.83 ± 1.35  | 1.86 ± 0.39  |
| Val        | 0.55 ± 0.29                                                                | 1.42 ± 0.20  | 0.86 ± 0.33  | 0.38 ± 0.28              | 0.42 ± 0.05  | 1.16 ± 0.21  |
| GABA       | 0.78 ± 0.52                                                                | 3.89 ± 0.92  | 15.50 ± 0.55 | 0.68 ± 0.08              | 4.34 ± 0.24  | 14.66 ± 0.58 |

Values represent mean ± SE (n = 3).

**Supplementary Table S4.**  $^{13}\text{C}$  enrichment distribution among each mass peak (from m+1 to m+4) of organic acids and amino acids after [ $^{13}\text{C}$ ]Pyr-incubation of roots of wheat plants grown under nitrate (RN-[ $^{13}\text{C}$ ]Pyr) or ammonium (RA-[ $^{13}\text{C}$ ]Pyr) nutrition.

|            |                      | $^{13}\text{C}$ organic acid and [ $^{13}\text{C}$ ]amino acid enrichment (%) |              |              |                           |              |              |              |
|------------|----------------------|-------------------------------------------------------------------------------|--------------|--------------|---------------------------|--------------|--------------|--------------|
|            |                      | RN-[ $^{13}\text{C}$ ]Pyr                                                     |              |              | RA-[ $^{13}\text{C}$ ]Pyr |              |              |              |
|            | C atoms per molecule | Mass peak                                                                     | 30 min       | 2 h          | 6 h                       | 30 min       | 2 h          | 6 h          |
| Pyr        | C3                   | m+1                                                                           | 0.13 ± 0.03  | 0.24 ± 0.00  | 1.03 ± 0.21               | 0.23 ± 0.04  | 0.57 ± 0.04  | 1.16 ± 0.12  |
|            |                      | m+2                                                                           | 1.19 ± 0.06  | 1.32 ± 0.03  | 1.65 ± 0.03               | 1.19 ± 0.07  | 1.38 ± 0.02  | 1.79 ± 0.05  |
|            |                      | m+3                                                                           | 79.90 ± 5.07 | 87.68 ± 1.26 | 78.24 ± 5.45              | 77.17 ± 5.25 | 73.19 ± 3.33 | 73.47 ± 2.12 |
| Citrate    | C6                   | m+1                                                                           | 0.82 ± 0.46  | 1.54 ± 0.20  | 4.58 ± 0.61               | 1.92 ± 0.91  | 3.80 ± 0.20  | 7.76 ± 0.34  |
|            |                      | m+2                                                                           | 1.16 ± 0.32  | 4.67 ± 0.55  | 10.85 ± 0.56              | 4.88 ± 0.44  | 9.28 ± 0.19  | 18.48 ± 0.23 |
|            |                      | m+3                                                                           | 0.80 ± 0.29  | 2.92 ± 0.39  | 7.20 ± 0.42               | 3.10 ± 0.23  | 6.12 ± 0.11  | 13.00 ± 0.09 |
|            |                      | m+4                                                                           | 0.44 ± 0.16  | 1.75 ± 0.23  | 4.29 ± 0.30               | 1.72 ± 0.12  | 3.68 ± 0.05  | 7.98 ± 0.05  |
| Isocitrate | C6                   | m+1                                                                           | 1.11 ± 0.41  | 2.71 ± 0.00  | 2.49 ± 1.16               | 1.94 ± 0.36  | 2.79 ± 0.77  | 8.04 ± 0.28  |
|            |                      | m+2                                                                           | 0.84 ± 0.25  | 3.43 ± 0.00  | 4.69 ± 0.28               | 3.70 ± 0.52  | 6.97 ± 0.09  | 17.20 ± 0.18 |
|            |                      | m+3                                                                           | 0.00 ± 0.00  | 1.94 ± 0.00  | 3.15 ± 0.25               | 2.95 ± 0.50  | 5.26 ± 0.20  | 12.18 ± 0.07 |
|            |                      | m+4                                                                           | 0.12 ± 0.05  | 1.40 ± 0.00  | 1.25 ± 0.21               | 1.68 ± 0.08  | 2.88 ± 0.08  | 7.38 ± 0.06  |
| 2-OG       | C5                   | m+1                                                                           | 0.24 ± 0.06  | 2.75 ± 0.21  | 6.95 ± 0.02               | 1.01 ± 0.09  | 3.29 ± 0.15  | 6.07 ± 0.12  |
|            |                      | m+2                                                                           | 1.96 ± 0.12  | 9.52 ± 0.39  | 13.45 ± 0.81              | 5.23 ± 0.29  | 10.94 ± 0.13 | 15.85 ± 0.32 |
|            |                      | m+3                                                                           | 0.87 ± 0.05  | 2.62 ± 0.02  | 5.30 ± 0.35               | 1.64 ± 0.14  | 4.10 ± 0.08  | 6.55 ± 0.11  |
|            |                      | m+4                                                                           | 0.40 ± 0.03  | 1.40 ± 0.13  | 2.64 ± 0.25               | 0.72 ± 0.04  | 2.09 ± 0.04  | 3.79 ± 0.09  |
| Succinate  | C4                   | m+1                                                                           | 0.09 ± 0.08  | 2.32 ± 0.23  | 7.64 ± 0.21               | 0.27 ± 0.12  | 2.27 ± 0.07  | 5.47 ± 0.15  |
|            |                      | m+2                                                                           | 1.10 ± 0.09  | 7.13 ± 0.29  | 11.34 ± 0.78              | 3.14 ± 0.20  | 7.70 ± 0.21  | 12.29 ± 0.20 |
|            |                      | m+3                                                                           | 0.31 ± 0.05  | 1.99 ± 0.13  | 4.24 ± 0.35               | 0.83 ± 0.11  | 2.28 ± 0.10  | 4.43 ± 0.08  |
|            |                      | m+4                                                                           | 0.14 ± 0.03  | 0.80 ± 0.06  | 1.50 ± 0.13               | 0.39 ± 0.06  | 1.01 ± 0.04  | 1.74 ± 0.04  |
| Fumarate   | C4                   | m+1                                                                           | 0.12 ± 0.06  | 0.60 ± 0.06  | 1.32 ± 0.06               | 0.68 ± 0.03  | 1.01 ± 0.10  | 2.80 ± 0.14  |
|            |                      | m+2                                                                           | 0.24 ± 0.01  | 0.73 ± 0.09  | 1.76 ± 0.12               | 0.59 ± 0.10  | 1.15 ± 0.00  | 3.55 ± 0.15  |
|            |                      | m+3                                                                           | 0.03 ± 0.01  | 0.22 ± 0.06  | 0.55 ± 0.07               | 0.27 ± 0.02  | 0.60 ± 0.01  | 1.53 ± 0.08  |
|            |                      | m+4                                                                           | 0.00 ± 0.00  | 0.06 ± 0.00  | 0.20 ± 0.04               | 0.08 ± 0.02  | 0.22 ± 0.01  | 0.59 ± 0.04  |
| Malate     | C4                   | m+1                                                                           | 0.22 ± 0.11  | 1.04 ± 0.08  | 3.75 ± 0.38               | 0.84 ± 0.36  | 3.84 ± 0.41  | 7.13 ± 0.25  |
|            |                      | m+2                                                                           | 0.19 ± 0.10  | 1.65 ± 0.15  | 5.28 ± 0.63               | 0.94 ± 0.15  | 4.21 ± 0.45  | 9.01 ± 0.24  |
|            |                      | m+3                                                                           | 0.11 ± 0.00  | 0.78 ± 0.14  | 2.59 ± 0.41               | 0.71 ± 0.07  | 2.21 ± 0.25  | 4.23 ± 0.10  |
|            |                      | m+4                                                                           | 0.00 ± 0.00  | 0.31 ± 0.05  | 1.24 ± 0.20               | 0.39 ± 0.03  | 0.99 ± 0.11  | 1.88 ± 0.03  |
| Ala        | C3                   | m+1                                                                           | 0.11 ± 0.02  | 1.30 ± 0.14  | 3.96 ± 0.18               | 0.45 ± 0.33  | 0.73 ± 0.11  | 1.80 ± 0.06  |
|            |                      | m+2                                                                           | 0.31 ± 0.04  | 1.69 ± 0.16  | 3.17 ± 0.25               | 0.37 ± 0.11  | 0.74 ± 0.06  | 1.77 ± 0.08  |
|            |                      | m+3                                                                           | 10.30 ± 2.36 | 23.18 ± 0.80 | 20.08 ± 1.48              | 6.52 ± 0.72  | 6.87 ± 0.36  | 8.46 ± 0.14  |
| Glu        | C5                   | m+1                                                                           | 0.63 ± 0.11  | 2.44 ± 0.17  | 6.50 ± 0.15               | 0.85 ± 0.22  | 2.92 ± 0.12  | 5.87 ± 0.10  |
|            |                      | m+2                                                                           | 1.83 ± 0.22  | 10.32 ± 0.37 | 13.78 ± 1.15              | 4.05 ± 0.19  | 9.68 ± 0.11  | 16.13 ± 0.18 |
|            |                      | m+3                                                                           | 0.72 ± 0.13  | 4.32 ± 0.18  | 6.88 ± 0.62               | 1.77 ± 0.11  | 4.61 ± 0.07  | 8.40 ± 0.07  |
|            |                      | m+4                                                                           | 0.35 ± 0.07  | 2.13 ± 0.11  | 3.53 ± 0.37               | 0.86 ± 0.07  | 2.39 ± 0.05  | 4.69 ± 0.01  |
| Gln        | C5                   | m+1                                                                           | 0.00 ± 0.00  | 2.21 ± 0.37  | 4.49 ± 0.39               | 0.00 ± 0.00  | 1.11 ± 0.19  | 1.28 ± 0.68  |
|            |                      | m+2                                                                           | 0.63 ± 0.21  | 6.75 ± 0.11  | 9.95 ± 0.98               | 0.83 ± 0.23  | 3.95 ± 0.32  | 5.44 ± 0.84  |
|            |                      | m+3                                                                           | 0.09 ± 0.00  | 3.18 ± 0.17  | 4.89 ± 0.81               | 0.48 ± 0.23  | 2.09 ± 0.27  | 2.78 ± 0.50  |
|            |                      | m+4                                                                           | 0.03 ± 0.00  | 1.39 ± 0.12  | 2.37 ± 0.43               | 0.38 ± 0.07  | 0.88 ± 0.19  | 1.40 ± 0.30  |
| Asp        | C4                   | m+1                                                                           | 0.79 ± 0.07  | 3.41 ± 0.31  | 6.65 ± 0.26               | 2.00 ± 0.26  | 3.57 ± 0.08  | 6.34 ± 0.22  |
|            |                      | m+2                                                                           | 0.73 ± 0.04  | 4.73 ± 0.35  | 8.42 ± 0.79               | 1.23 ± 0.18  | 3.81 ± 0.08  | 7.84 ± 0.20  |
|            |                      | m+3                                                                           | 0.33 ± 0.03  | 2.12 ± 0.23  | 4.56 ± 0.48               | 0.67 ± 0.25  | 1.32 ± 0.00  | 4.28 ± 0.11  |
|            |                      | m+4                                                                           | 0.13 ± 0.01  | 0.95 ± 0.12  | 1.98 ± 0.24               | 0.28 ± 0.11  | 0.53 ± 0.00  | 1.91 ± 0.08  |
| Asn        | C4                   | m+1                                                                           | 0.20 ± 0.09  | 0.41 ± 0.07  | 1.59 ± 0.52               | 0.00 ± 0.00  | 0.44 ± 0.04  | 0.39 ± 0.19  |
|            |                      | m+2                                                                           | 0.22 ± 0.00  | 0.37 ± 0.09  | 2.41 ± 0.73               | 0.00 ± 0.00  | 0.43 ± 0.02  | 0.66 ± 0.06  |
|            |                      | m+3                                                                           | 0.12 ± 0.00  | 0.18 ± 0.06  | 0.97 ± 0.37               | 0.09 ± 0.00  | 0.26 ± 0.03  | 0.30 ± 0.01  |
|            |                      | m+4                                                                           | 0.02 ± 0.00  | 0.08 ± 0.03  | 0.48 ± 0.17               | 0.09 ± 0.00  | 0.14 ± 0.03  | 0.08 ± 0.03  |
| GABA       | C4                   | m+1                                                                           | 0.10 ± 0.00  | 0.82 ± 0.40  | 5.24 ± 0.02               | 0.10 ± 0.04  | 0.56 ± 0.09  | 3.09 ± 0.07  |
|            |                      | m+2                                                                           | 0.55 ± 0.39  | 2.27 ± 0.33  | 7.05 ± 0.29               | 0.42 ± 0.04  | 2.65 ± 0.12  | 8.02 ± 0.37  |
|            |                      | m+3                                                                           | 0.18 ± 0.00  | 0.63 ± 0.13  | 2.37 ± 0.12               | 0.10 ± 0.02  | 0.79 ± 0.04  | 2.58 ± 0.11  |
|            |                      | m+4                                                                           | 0.08 ± 0.00  | 0.17 ± 0.06  | 0.84 ± 0.13               | 0.05 ± 0.01  | 0.33 ± 0.02  | 0.96 ± 0.04  |

For each molecule, the gray scale illustrates the highest (dark gray) and the lowest (white) enrichment value under each N nutrition. Values represent mean ± SE (n = 3).

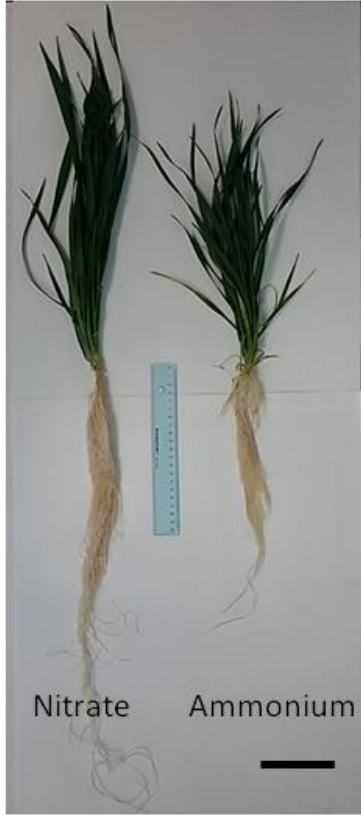

**Supplementary Figure S1.** Six-week old wheat plants grown under nitrate or ammonium nutrition. Scale bar indicates 10 cm length.

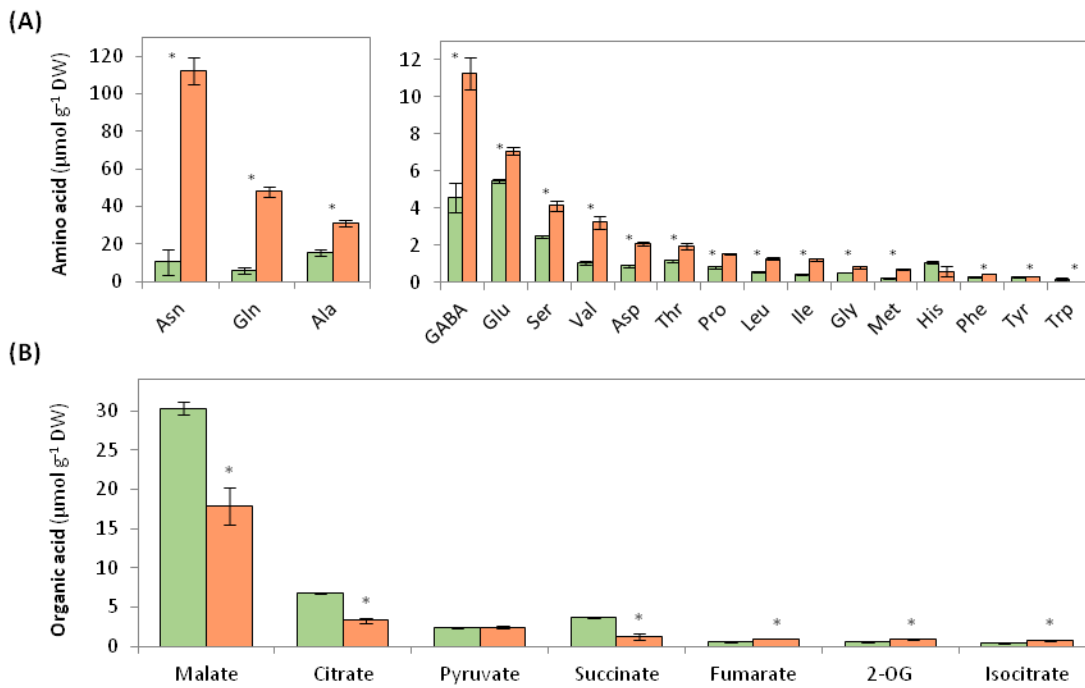

**Supplementary Figure S2.** Total (A) amino acids and (B) organic acids from wheat roots grown under nitrate (RN; green) or ammonium (RA; orange) nutrition. Values represent mean  $\pm$  SE (n = 3). Asterisk (\*) indicates significant differences between N nutrition (p < 0.05).

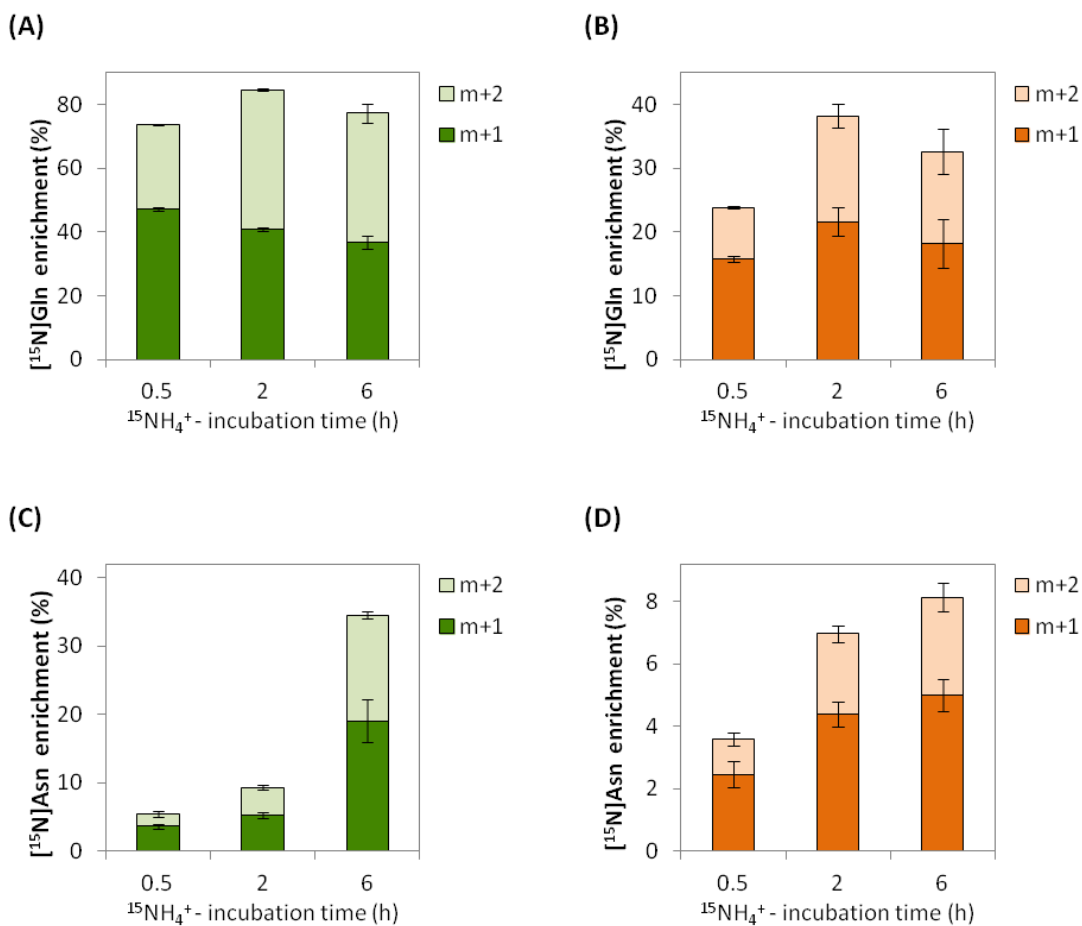

**Supplementary Figure S3.** Label distribution in one or two N atoms of amides after  $^{15}\text{NH}_4$ -incubation of wheat roots.  $^{15}\text{N}$  enrichment of one N atom (given by m+1 value) or two N atoms (given by m+2 value) for  $^{15}\text{N}$ Gln and  $^{15}\text{N}$ Asn in wheat plants grown under (A, C) nitrate or (B, D) ammonium nutrition. Values represent mean  $\pm$  SE (n = 3).



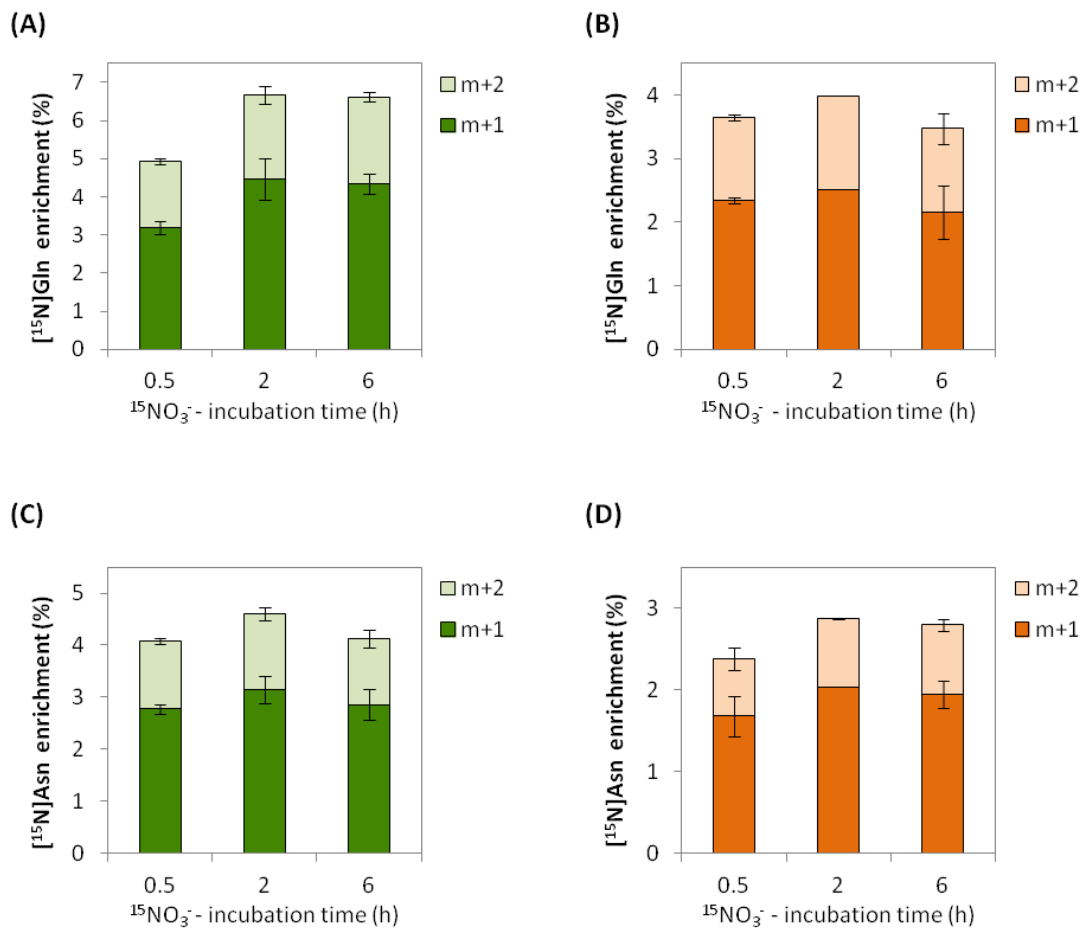

**Supplementary Figure S4.** Label distribution in one or two N atoms of amides after  $^{15}\text{NO}_3^-$ -incubation of wheat roots.  $^{15}\text{N}$  enrichment of one N atom (given by m+1 value) or two N atoms (given by m+2 value) for  $[^{15}\text{N}]\text{Gln}$  and  $[^{15}\text{N}]\text{Asn}$  in wheat plants grown under (A, C) nitrate or (B, D) ammonium nutrition. Values represent mean  $\pm$  SE (n = 3).

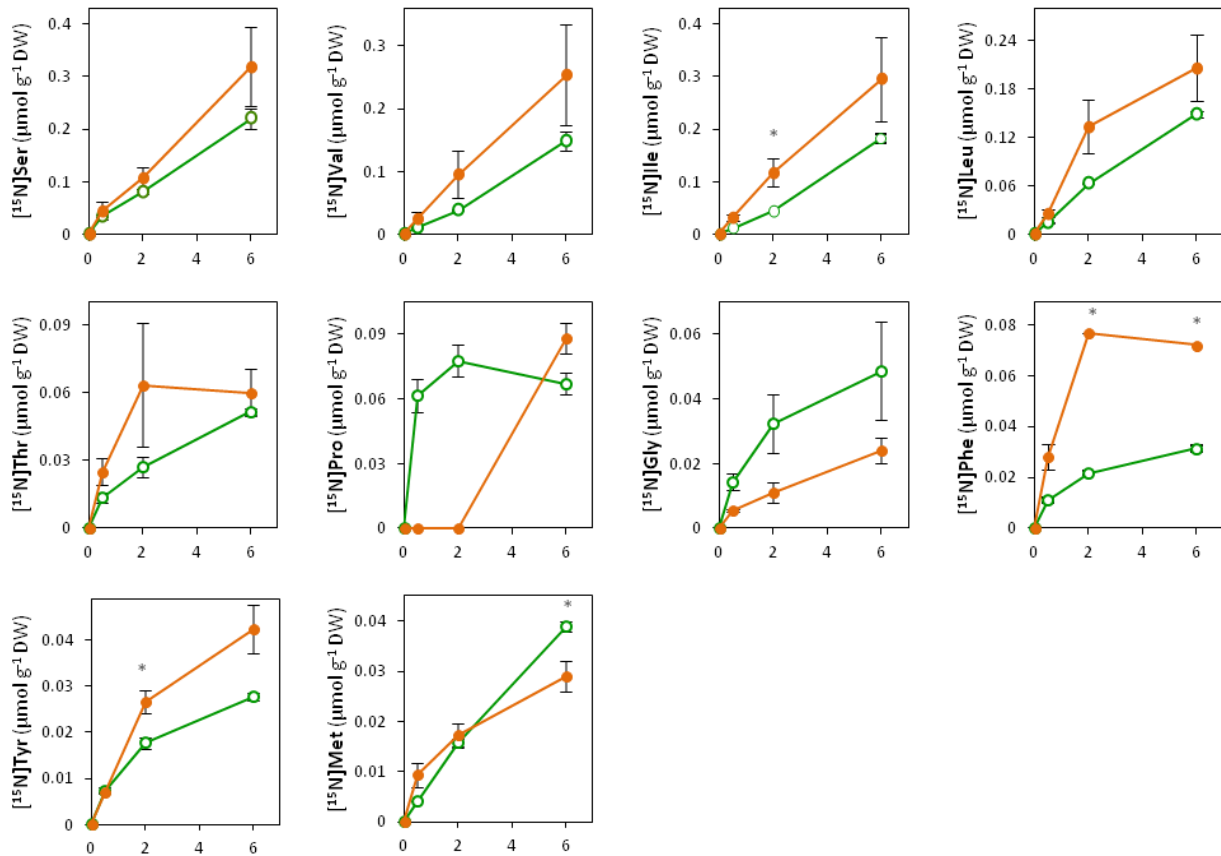

**Supplementary Figure S5.** Minor [ $^{15}\text{N}$ ]amino acid contents ( $\mu\text{mol g}^{-1}\text{ DW}$ ) after  $^{15}\text{NH}_4^+$ -incubation of roots of wheat plants previously grown under nitrate (green open circle) or ammonium (orange closed circle) nutrition. X-axis indicates the incubation times: 0.5, 2, and 6 h. Values represent mean  $\pm$  SE (n = 3). Asterisk (\*) indicates significant differences between N nutrition (p < 0.05).

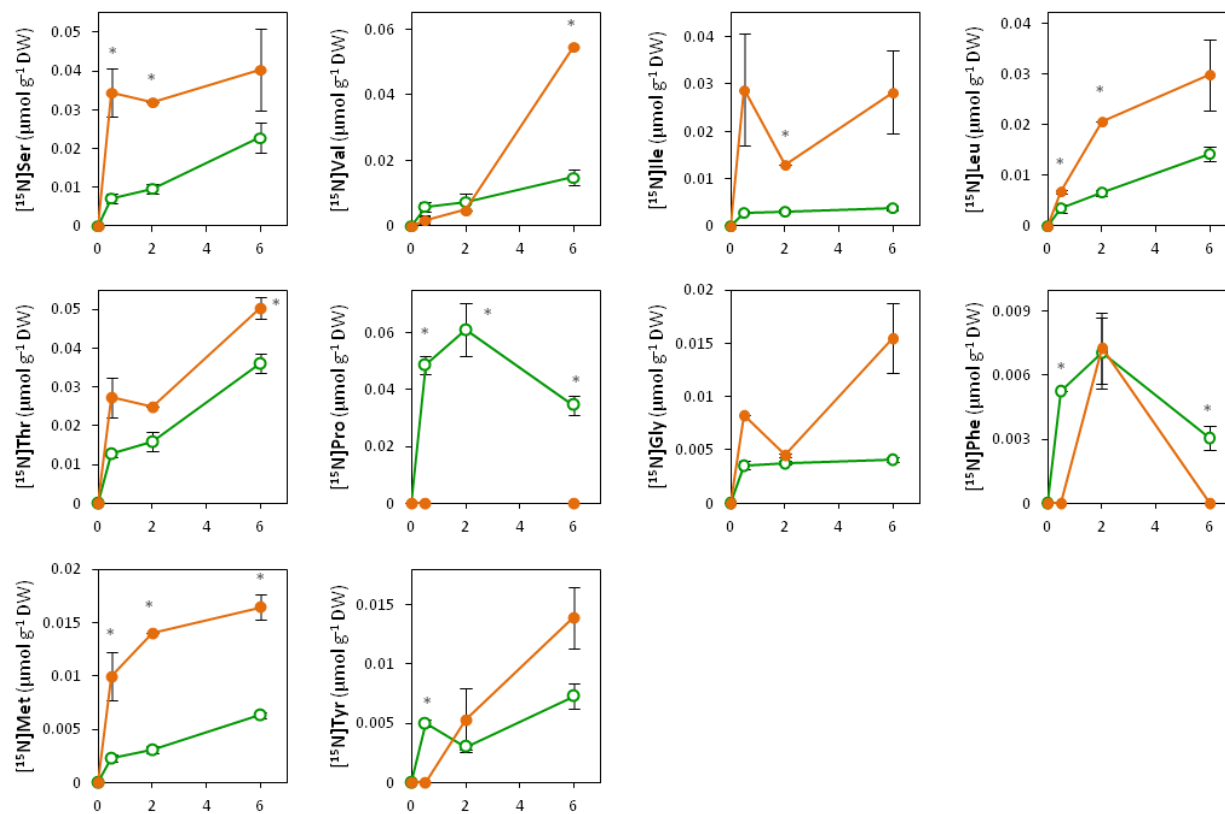

**Supplementary Figure S6.** Minor [ $^{15}\text{N}$ ]amino acid contents ( $\mu\text{mol g}^{-1}\text{ DW}$ ) after  $^{15}\text{NO}_3^-$ -incubation of roots of wheat plants previously grown under nitrate (green open circle) or ammonium (orange closed circle) nutrition. X-axis indicates the incubation times: 0.5, 2, and 6 h. Values represent mean  $\pm$  SE ( $n = 3$ ). Asterisk (\*) indicates significant differences between N nutrition ( $p < 0.05$ ).

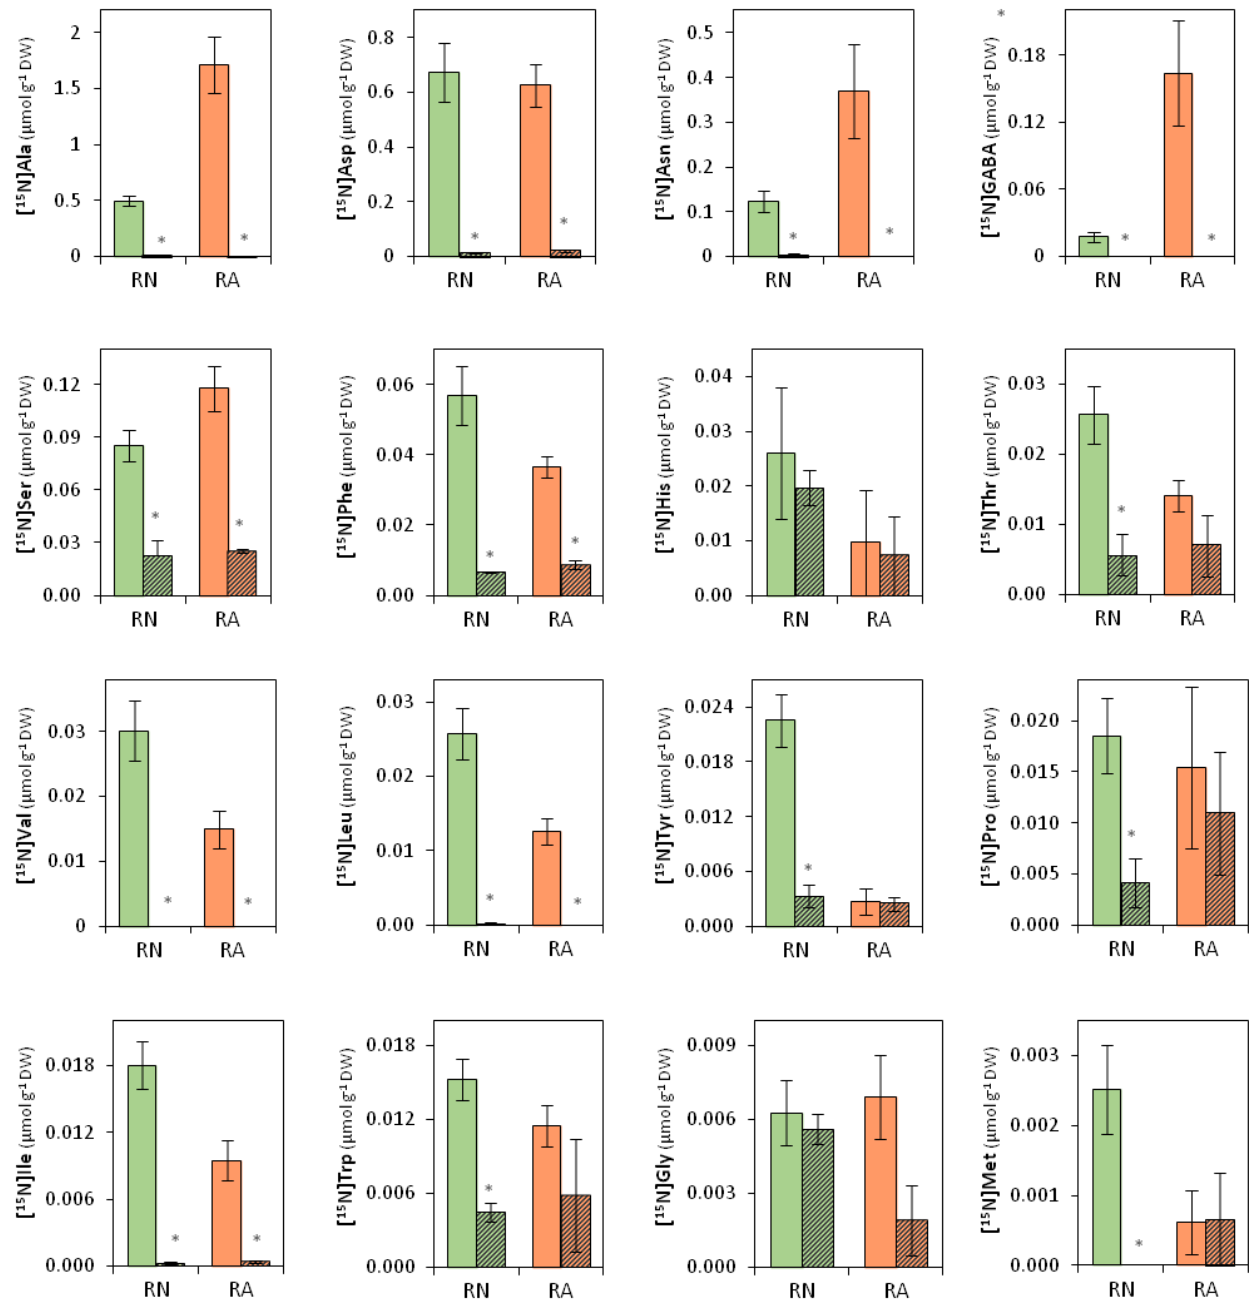

**Supplementary Figure S7.** Contents of other labelled amino acids in wheat roots grown under nitrate (RN; green) or ammonium (RA; orange) nutrition incubated with 10 mM  $^{15}\text{NH}_4^+$  for 30 minutes in absence (plain bar) or in presence of inhibitors MSX and AZA (striped bar). Values represent mean  $\pm$  SE ( $n = 3$ ). Asterisk (\*) indicates significant differences between N nutrition conditions ( $p < 0.05$ ).

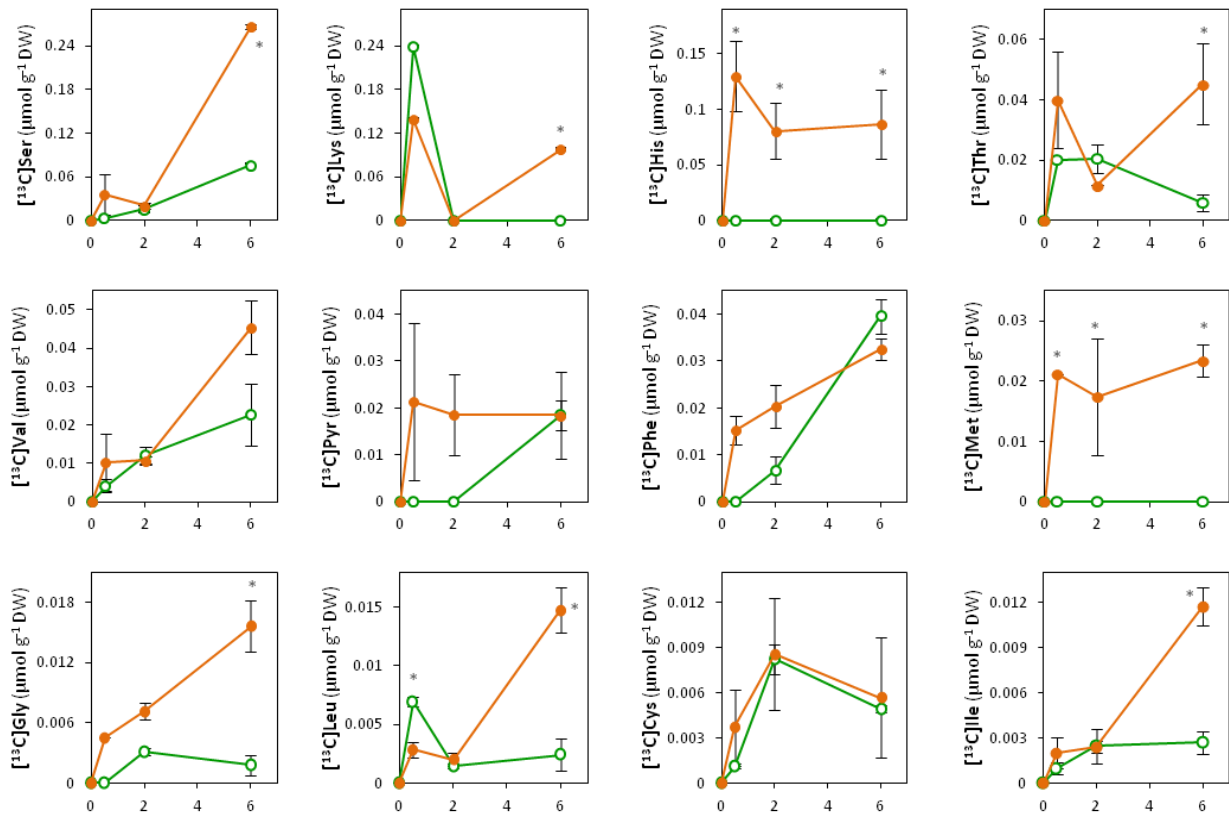

**Supplementary Figure S8.** Minor  $[^{15}\text{N}]$ amino acid and  $[^{13}\text{C}]$ organic acid contents ( $\mu\text{mol g}^{-1}$  DW) after  $[^{13}\text{C}]$ Pyr -incubation of roots of plants previously grown under nitrate (green open circle) or ammonium (orange closed circle) nutrition. X-axis indicates the incubation times: 0.5, 2 and 6 h. Values represent mean  $\pm$  SE (n = 3). Asterisk (\*) indicates significant differences between N nutrition (p < 0.05).
